# Supplementary material for: Enrichment of native plastic‐associated biofilm communities to enhance polyester degrading activity
Source: PubMed Central journal article supplement (PMC10947123; doi:10.1111/1462-2920.16466), 2023-07-28
Supplement: EMI-25-2698-s001.pdf [file EMI-25-2698-s001.pdf]

## Supplementary material

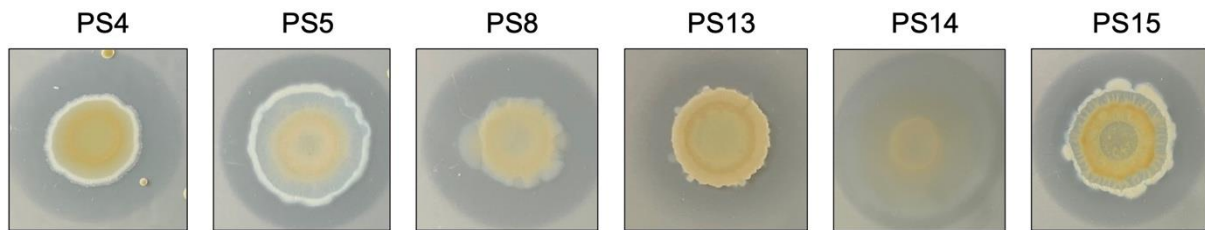

**Figure S1: Different colony morphologies between isolates.** (A) Single colony isolates of enriched strains found to be *P. stutzeri* from 16S rRNA sequencing, these have different colony morphology in colour, size and shape on 1% PCL agar plates, zones of clearance correspond to day 3 of Fig. 4A.

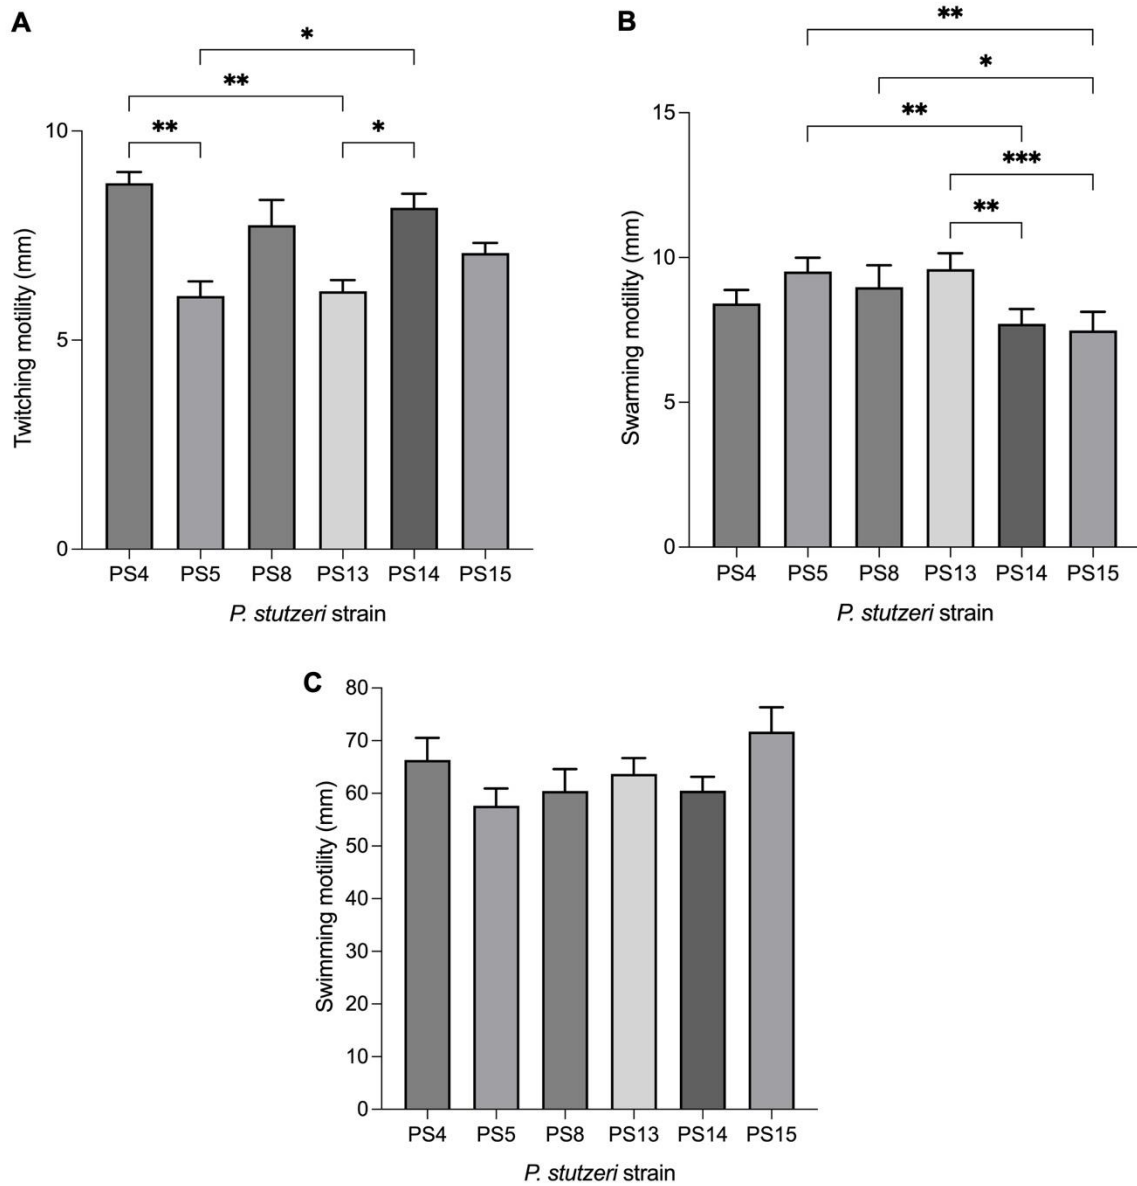

**Figure S2: Motility assays of *P. stutzeri* isolates.** (A) Twitching motility assay, mean and SD of 3 biological replicates, (B) swarming motility assay, mean and SD of 4 biological replicates, (C) swimming motility assay, mean and SD of 3 biological replicates. Each biological replicate consists of 3 technical replicates.

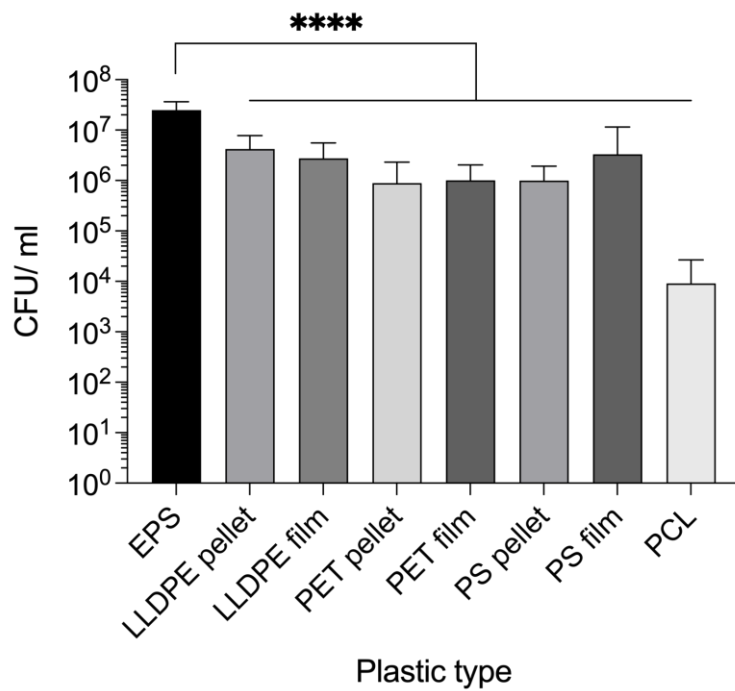

**Figure S3: *P. stutzeri* attachment to different plastics.** PS13 single isolate *P. stutzeri* attached significantly more to EPS than the other plastics tested. Mean and SD from 9 pieces of plastic from 3 advanced technical repeats of 3 biological repeats (6 pieces of plastic from 2 biological repeats for PCL), one-way ANOVA was performed with multiple comparisons, the difference between EPS and each of the other plastics was  $p < 0.0001$ .

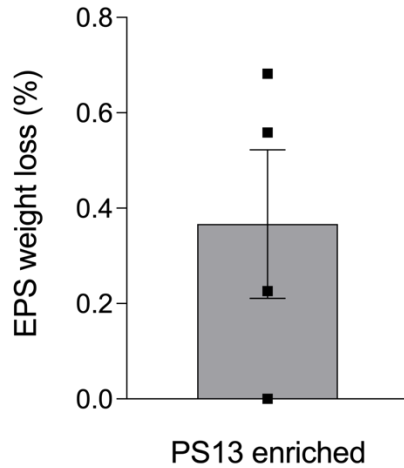

**Figure S4: EPS weight loss assay.** Overnight cultures of PS13 enriched communities were rinsed in PBS 3 times to remove nutrient rich media.  $OD_{600}$  1 was inoculated into flasks of 15 mL of high-salt M9 minimal media with ~ 0.09 g of pure untreated EPS. Cultures were grown at room temperature with agitation for 77 days. The EPS was removed from the cultures, sonicated to remove attached bacteria, rinsed briefly in 2 % sodium dodecyl sulfate, rinsed with distilled water and dried before weighing. Mean and SEM of 4 advanced technical replicates. Whilst some weight loss was observed of the untreated EPS, due to the lightweight nature of EPS, the average weight loss of 0.37 % was only equivalent to less than 1 mg so was not deemed significant considering human and mechanical error with the weighing scales.

**Table S1: Overall genome properties of PS13**

| <b>Genome feature</b>                  | <b>PS13</b> |
|----------------------------------------|-------------|
| <b>Size (bp)</b>                       | 4610224     |
| <b>Number of contigs</b>               | 12          |
| <b>Largest contig (bp)</b>             | 1117968     |
| <b>N50</b>                             | 840153      |
| <b>L50</b>                             | 3           |
| <b>GC content (%)</b>                  | 62.92       |
| <b>Completeness (%)</b>                | 100.0       |
| <b>Contamination (%)</b>               | 0.14        |
| <b>Number of coding sequences</b>      | 4291        |
| <b>Number of hypothetical proteins</b> | 1721        |
